# Supplementary material for: Development of poly(vinyl alcohol)/chitosan/aloe vera gel electrospun composite nanofibers as a novel sorbent for thin-film micro-extraction of pesticides in water and food samples followed by HPLC-UV analysis
Source: Royal Society of Chemistry journal article supplement (doi:10.1039/d1nj05634d), 2021-12-27
Supplement: d1nj05634d1.pdf [file d1nj05634d1.pdf]

## Electronic Supporting Material

**Development of poly(vinyl alcohol) / chitosan / aloe vera gel electrospun composite nanofibers as a novel sorbent for thin-film micro-extraction of pesticides in water and food samples followed by HPLC-UV analysis**

Saeed Hejabri kandeh<sup>a</sup>, Shima Amini<sup>a</sup>, Homeira Ebrahimzadeh<sup>a\*</sup>

<sup>a</sup> *Department of Analytical Chemistry and Pollutants, Faculty of Chemistry and Petroleum Sciences, Shahid Beheshti University, Tehran, Iran*

\* Corresponding author: Tel.: +98 21 29902891, fax: +98 21 22403041.

E-mail address: h-ebrahim@sbu.ac.ir (H. Ebrahimzadeh)

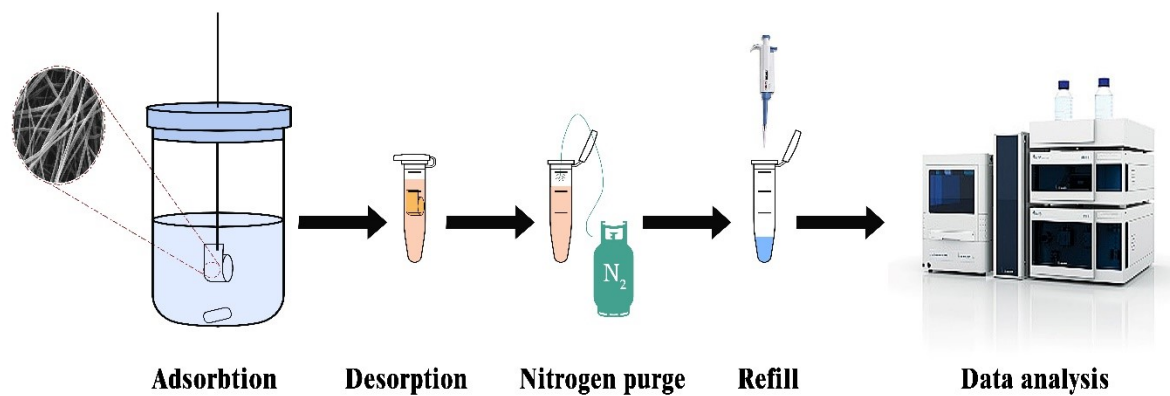

**Fig. S1.** A schematic illustration of TFME-HPLC-UV method based on PVA/CA/CS/AV as the sorbent.

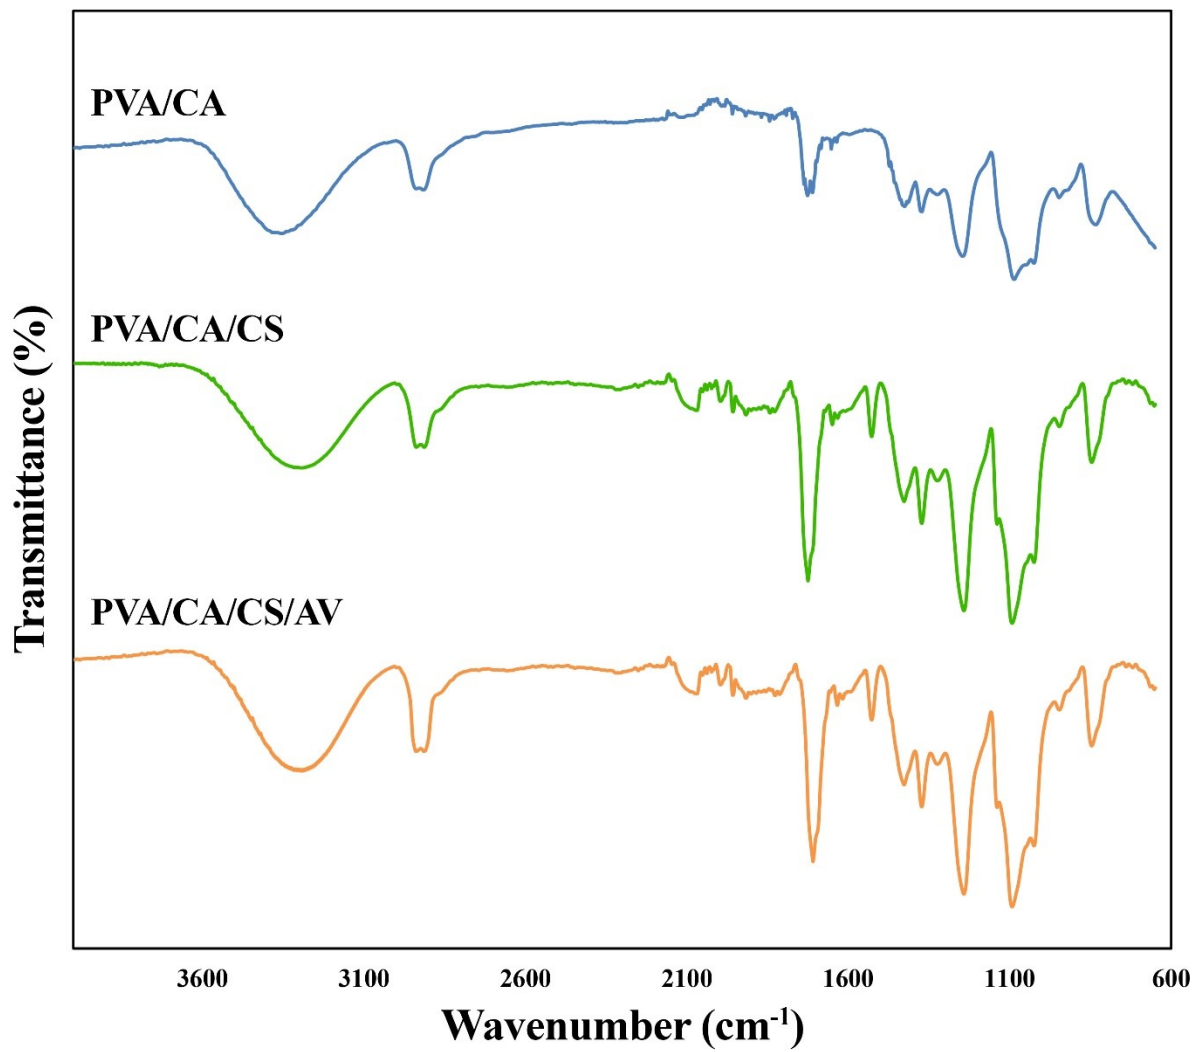

**Fig. S2.** FT-IR spectra of PVA/CA, PVA/CA/CS, and PVA/CA/CS/AV nanofibers.

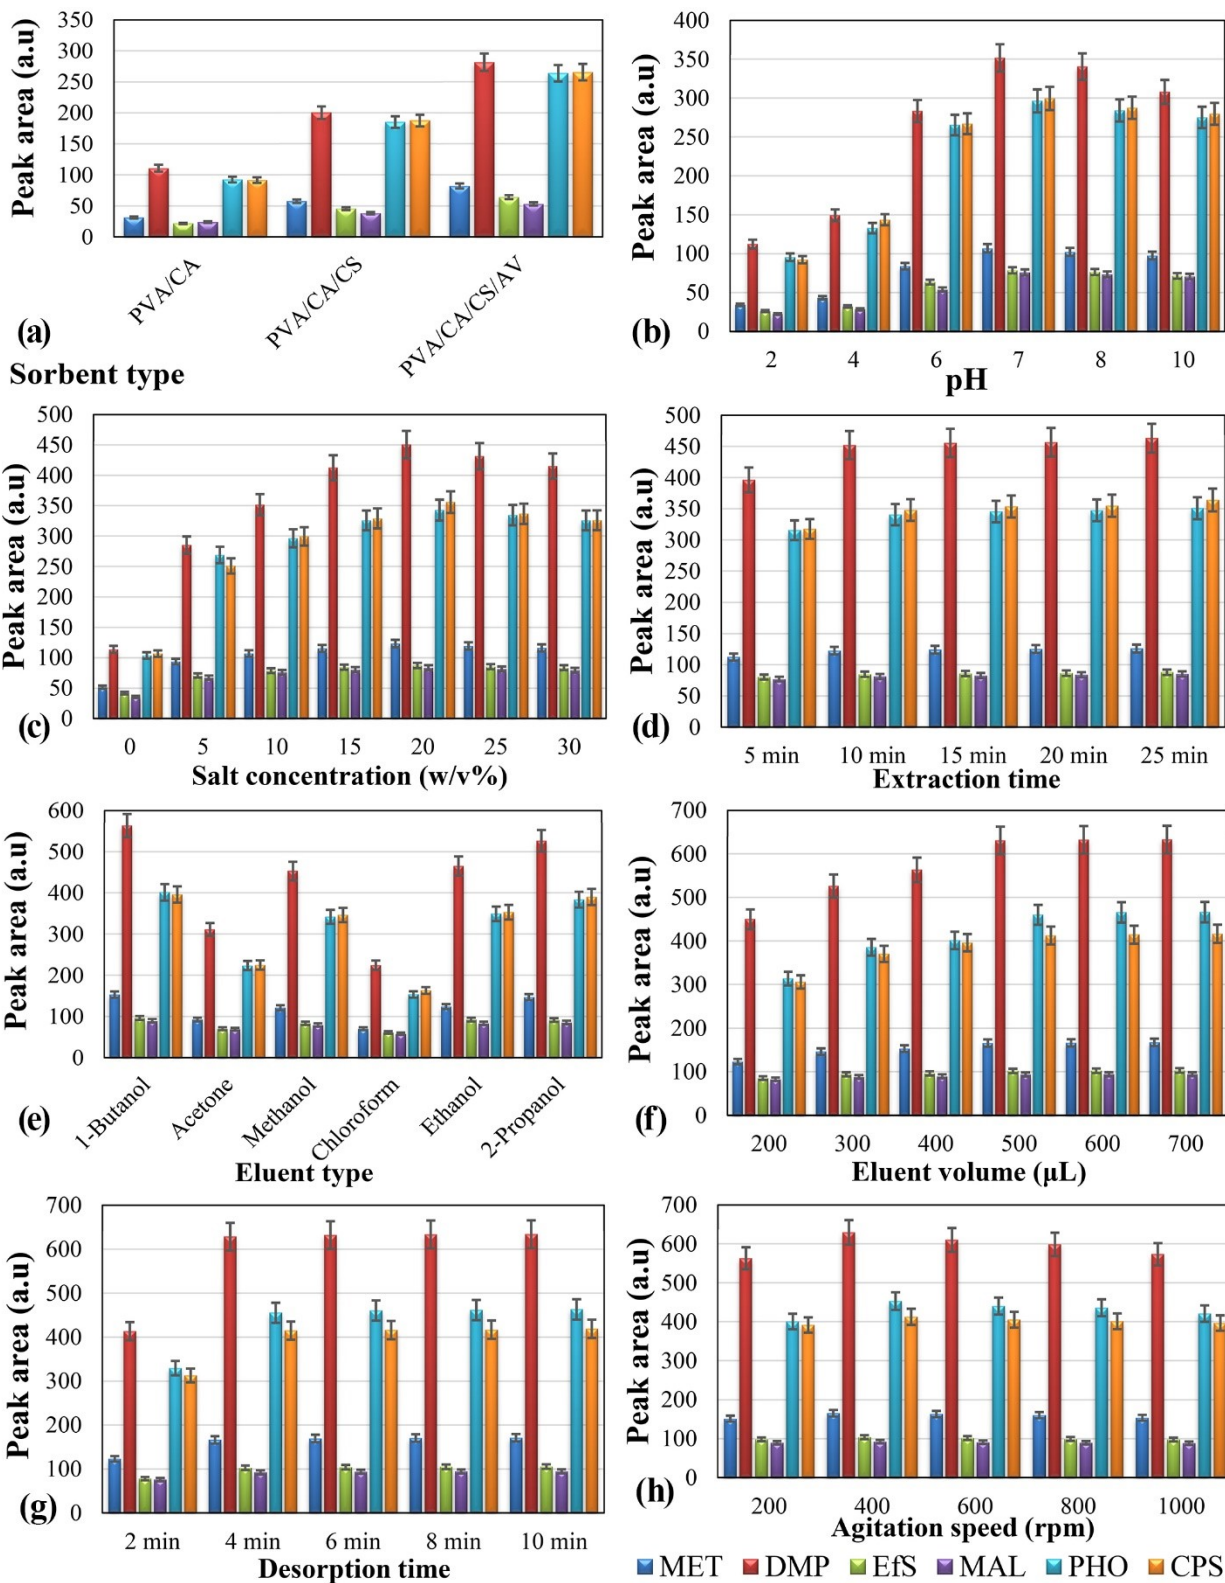

**Fig. S3.** Effect of (a) sorbent type, (b) sample pH, (c) salt concentration, (d) extraction time, (e) eluent type, (f) eluent volume, (g) desorption time, (h) agitation speed. Extraction

conditions; sample pH: 7.0; salt concentration: 20 (w/v%); extraction time: 10 min; eluent type: 1-butanol; eluent volume: 500  $\mu$ L; desorption time: 4 min; agitation speed: 400 rpm.

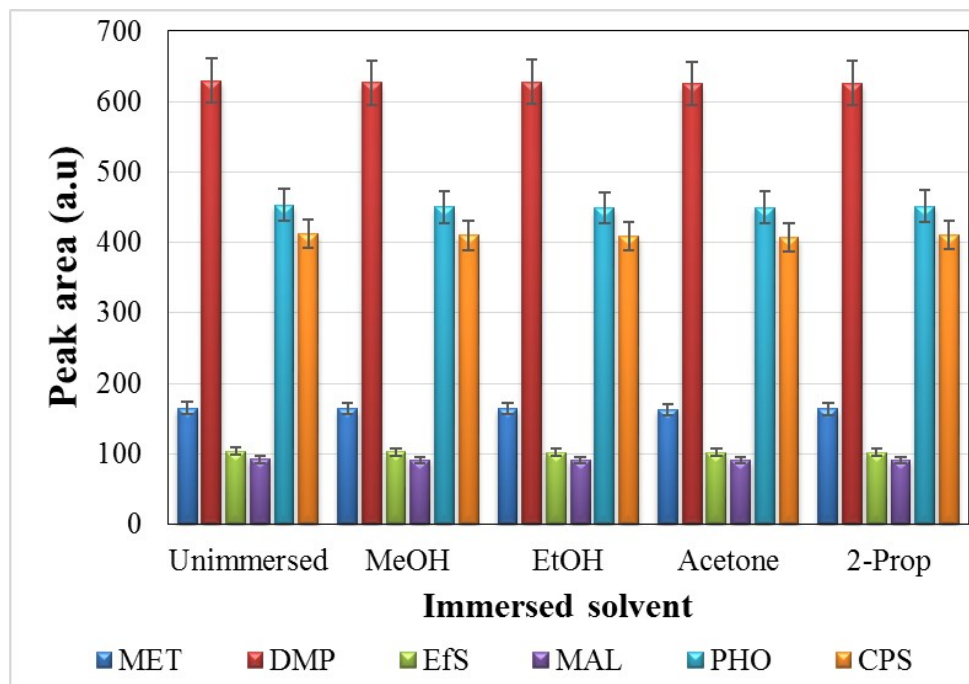

**Fig. S4.** Solvent stability of PVA/CA/CS/AV composite nanofibers after immersing in different organic solvents for 2 h.

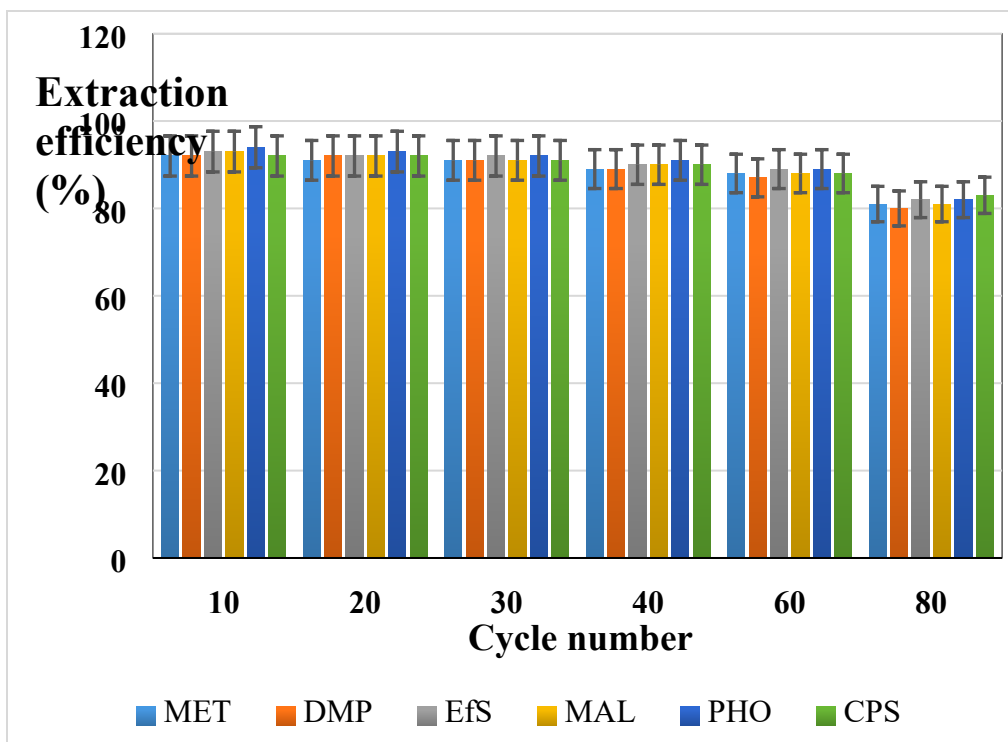

**Fig. S5.** Reusability of PVA/CA/CS/AV composite nanofibers.

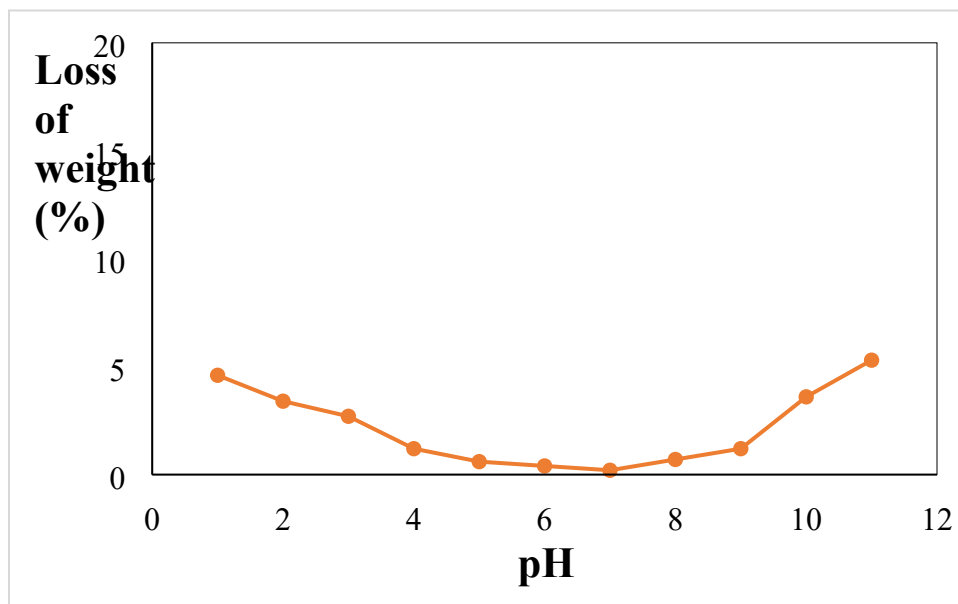

**Fig. S6.** pH stability of PVA/CA/CS/AV composite nanofibers.

**Table S1.** Different isotherm models and their parameters.

| Isotherm   | Equation and parameters                              | Unit                | MET    | DMP    | EFS    | MAL    | PHO    | CPS    |
|------------|------------------------------------------------------|---------------------|--------|--------|--------|--------|--------|--------|
| Freundlich | $\text{Log } q_e = m \text{ Log } C_e + \log \alpha$ |                     |        |        |        |        |        |        |
|            | $\log q_e \text{ vs. } \log C_e$                     |                     |        |        |        |        |        |        |
|            | m                                                    | -                   | 0.6277 | 0.6410 | 0.6600 | 0.7000 | 0.4186 | 0.4357 |
|            | $\alpha$                                             | L mg <sup>-1</sup>  | 7.34   | 6.95   | 4.55   | 4.70   | 28.39  | 44.13  |
|            | R <sup>2</sup>                                       | -                   | 0.9878 | 0.9851 | 0.9843 | 0.9868 | 0.9868 | 0.9607 |
| Langmuir   | $C_e/q_e = (1/Q_m K_L) + C_e/Q_m$                    |                     |        |        |        |        |        |        |
|            | $C_e/q_e \text{ vs. } C_e$                           |                     |        |        |        |        |        |        |
|            | Q <sub>Equilibrium</sub>                             | mg g <sup>-1</sup>  | 273.0  | 279.0  | 213.0  | 265.0  | 324.0  | 301.0  |
|            | Q <sub>m,cal</sub>                                   | mg g <sup>-1</sup>  | 384.6  | 400.0  | 303.1  | 416.7  | 384.6  | 370.4  |
|            | K <sub>L</sub>                                       | L mg <sup>-1</sup>  | 0.0067 | 0.0064 | 0.0057 | 0.0049 | 0.0152 | 0.0100 |
|            | R <sup>2</sup>                                       | -                   | 0.9569 | 0.9514 | 0.9701 | 0.9559 | 0.9746 | 0.9274 |
| Temkin     | $q_e = B_1 \ln K_T + B_1 \ln C_e$                    |                     |        |        |        |        |        |        |
|            | $q_e \text{ vs. } \ln C_e$                           |                     |        |        |        |        |        |        |
|            | B <sub>1</sub>                                       | J mol <sup>-1</sup> | 69.00  | 71.00  | 54.56  | 70.79  | 59.51  | 56.89  |
|            | K <sub>T</sub>                                       | L g <sup>-1</sup>   | 0.118  | 0.114  | 0.098  | 0.095  | 0.451  | 0.317  |
|            | R <sup>2</sup>                                       | -                   | 0.9061 | 0.9037 | 0.9250 | 0.9102 | 0.8820 | 0.8159 |

**Table S2.** Pseudo-first order and pseudo-second-order rate equations and parameters.

| Kinetic             | Equation and parameters            | Unit                                 | MET     | DMP     | EFS     | MAL     | PHO     | CPS     |
|---------------------|------------------------------------|--------------------------------------|---------|---------|---------|---------|---------|---------|
| Pseudo-first order  | $\ln(q_e - q_t) = \ln q_e - k_1 t$ |                                      |         |         |         |         |         |         |
|                     | $\ln (q_e - q_t) \text{ vs. } t$   |                                      |         |         |         |         |         |         |
|                     | k <sub>1</sub>                     | Min <sup>-1</sup>                    | 0.015   | 0.014   | 0.012   | 0.013   | 0.012   | 0.016   |
|                     | q <sub>e (calc)</sub>              | mg g <sup>-1</sup>                   | 153.2   | 145.8   | 119.3   | 136.2   | 184.7   | 172.6   |
|                     | R <sup>2</sup>                     | -                                    | 0.8616  | 0.8854  | 0.9849  | 0.9782  | 0.9665  | 0.9763  |
| Pseudo-second order | $t/q_t = 1/k_2 q_e^2 + t/q_e$      |                                      |         |         |         |         |         |         |
|                     | $t/q_t \text{ vs. } t$             |                                      |         |         |         |         |         |         |
|                     | k <sub>2</sub>                     | g mg <sup>-1</sup> min <sup>-1</sup> | 0.00124 | 0.00148 | 0.00176 | 0.00159 | 0.00115 | 0.00092 |
|                     | q <sub>e (calc)</sub>              | mg g <sup>-1</sup>                   | 200.0   | 204.0   | 149.3   | 192.3   | 222.2   | 227.3   |
|                     | R <sup>2</sup>                     | -                                    | 0.9985  | 0.9989  | 0.9960  | 0.9975  | 0.9920  | 0.9893  |
